# Supplementary material for: Critical review of antibiotic resistance genes in the atmosphere
Source: Royal Society of Chemistry journal article supplement (doi:10.1039/d2em00091a), 2022-01-01
Supplement: d2em00091a1.pdf [file d2em00091a1.pdf]

Supplemental Material

**Sources and Transport of Antibiotic Resistance Genes in Air**

**Authors and affiliations**

David Kormos, Kaisen Lin, Amy Pruden, Linsey C. Marr

Civil and Environmental Engineering, Virginia Tech, Blacksburg, VA, USA

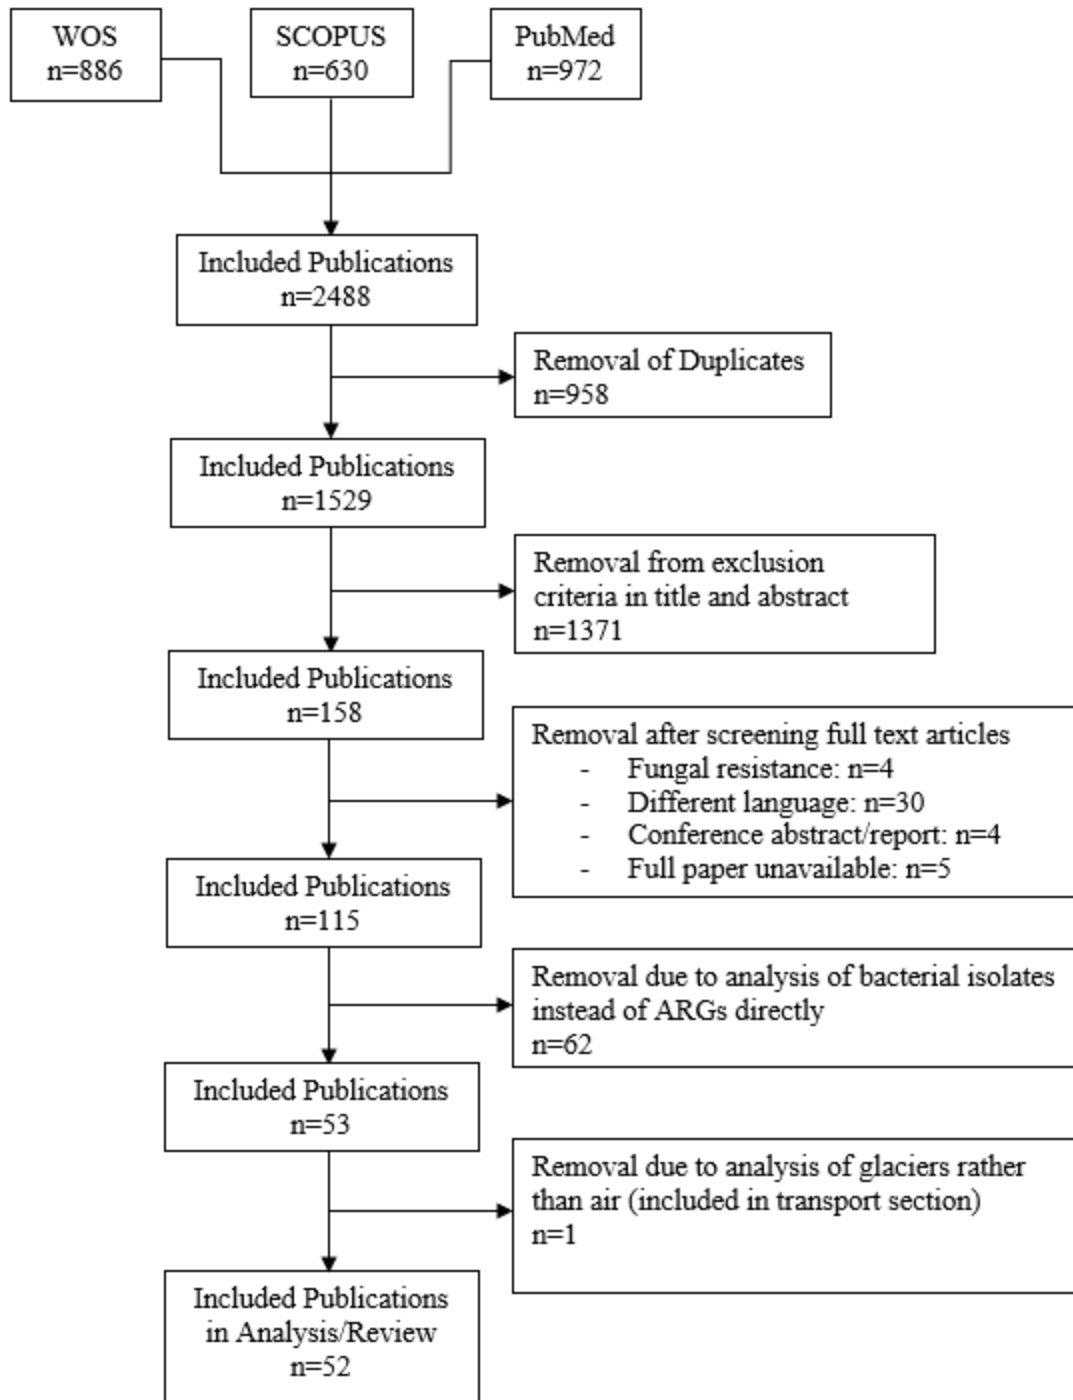

Figure S1: Selection methodology for articles/studies included in the systematic review. Papers were scrutinized through multiple rounds and eventually 54 papers were included in the review, along with one paper that was used in the subsection on air transport.

Table S1: Search Criteria for the literature search on the different databases

| <b>Database</b> | <b>Search Criteria</b>                                                                                                                                                                                                                                                       |
|-----------------|------------------------------------------------------------------------------------------------------------------------------------------------------------------------------------------------------------------------------------------------------------------------------|
| <b>WOS</b>      | TS=(("air" OR "airborne" OR "air-borne" OR bioaerosol* OR atmospher*) AND (antimicrobial* OR antibiotic* OR antibacterial*) NEAR/2 (resist*))                                                                                                                                |
| <b>SCOPUS</b>   | TITLE-ABS ( {air} OR {airborne} OR {air-borne} OR bioaerosol* OR atmospher* ) AND TITLE-ABS ( antimicrobial* OR antibiotic* OR antibacterial* PRE/2 resist*)                                                                                                                 |
| <b>PubMed</b>   | (air[Title/Abstract] OR airborne[Title/Abstract] OR air-borne[Title/Abstract] OR bioaerosol[Title/Abstract] OR atmospher*[Title/Abstract]) AND (antimicrobial*[Title/Abstract] OR antibiotic*[Title/Abstract] OR antibacterial*[Title/Abstract] AND resist*[Title/Abstract]) |

Table S2: Key urban air ARG studies identified in this review

| (Ref) Location                                               | Sample Type                            | Sample Fraction                        | ARGs / MGEs                                                                                                                                                       | Dominant ARGs                                                                                                                                                                                                                                                                                                                                                                                                                 | Analysis method (units)                                |
|--------------------------------------------------------------|----------------------------------------|----------------------------------------|-------------------------------------------------------------------------------------------------------------------------------------------------------------------|-------------------------------------------------------------------------------------------------------------------------------------------------------------------------------------------------------------------------------------------------------------------------------------------------------------------------------------------------------------------------------------------------------------------------------|--------------------------------------------------------|
| (37) 26 cities in China, 3 in North America, and 1 in Europe | Urban                                  | Fresh snow                             | Resistance to all major classes of antibiotics (285 primer sets), transposase genes (8 primer sets) / <i>intl</i> , and <i>cintI</i>                              | aminoglycosides, $\beta$ -lactams, and multidrug resistance. <i>blaCTX-M-04</i> , <i>blaCMY2-02</i> , <i>aadA1</i> , <i>aadA2-02</i> , and <i>vanC-03</i>                                                                                                                                                                                                                                                                     | HT-qPCR (gc/L)                                         |
| (25, 29) Beijing, China                                      | Urban air                              | PM <sub>2.5</sub> and PM <sub>10</sub> | Tetracycline, $\beta$ -lactam, aminoglycoside, chloramphenicol, polypeptide, multidrug, lincosamide, macrolide, streptogramin, and sulfonamide resistance classes | Polluted days: <i>tetW</i> , <i>aph(3'')-Ib</i> , and <i>lnuA</i> ; Clean days: <i>bacA</i> , <i>BL2cbro</i> , <i>lnuA</i> , and <i>macB</i> ; Antibiotic-polluted environments: <i>sul2</i> , <i>aph(6)-Ia</i> , <i>aph(3'')-Ib</i> , and quinolones ( <i>qnr</i> ) and $\beta$ -lactams                                                                                                                                     | Metagenomics (gc/16S)                                  |
| (26) Xi'an, China                                            | Urban air                              | PM <sub>2.5</sub>                      | $\beta$ -lactams, quinolones, macrolides, sulfonamides, tetracyclines, and aminoglycosides / <i>tnpA</i> , <i>intl1</i>                                           | <i>qepA</i> and <i>blaTEM</i>                                                                                                                                                                                                                                                                                                                                                                                                 | HT-qPCR (gc/16S)                                       |
| (26) 19 cities in 13 countries and 6 continents              | Automobile air conditioner filters     | Total suspended particles (TSP)        |                                                                                                                                                                   |                                                                                                                                                                                                                                                                                                                                                                                                                               | HT-qPCR (gc/16S)                                       |
| (41) Beijing, China                                          | Urban air (clean and polluted)         | PM <sub>2.5</sub>                      | $\beta$ -Lactam, sulfonamide, tetracycline, and macrolide resistance. / <i>intl1</i> , <i>tnpA</i>                                                                | Clean days: <i>blaTEM</i> , <i>tetW</i> , <i>sul3</i> , <i>tetQ</i> , <i>tetM</i> , <i>ermB</i> , <i>tet32</i> , and <i>tetO</i> ; Polluted days: <i>blaTEM</i> , <i>NDM-1</i> , <i>ermB</i> , <i>sul1</i> , <i>tetM</i> , <i>qepA</i> , <i>sul1</i> , <i>ermC</i> . / <i>tnpA</i> and <i>intl1</i> varied greatly, with <i>tnpA</i> abundant during both events, and <i>intl1</i> only abundant in February pollution event. | qPCR (gc/16S)                                          |
| (28) 4 cities in California, USA                             | Air, soil, and water from public parks | TSP                                    | <i>sul1</i> and <i>blashv</i>                                                                                                                                     | <i>blashv</i> 2 orders of magnitude higher than <i>sul1</i> , both detected                                                                                                                                                                                                                                                                                                                                                   | qPCR (gc/16S, gc/L)                                    |
| (33) La Paz, Bolivia                                         | Urban surface waters                   | TSP                                    | tetracyclines ( <i>tetA</i> ), fluoroquinolones ( <i>qnrB</i> ), and $\beta$ -lactams ( <i>blaTEM</i> ) / <i>intl1</i>                                            | <i>blaTEM</i> and <i>intl1</i> highest, followed by <i>tetA</i> and <i>qnrB</i>                                                                                                                                                                                                                                                                                                                                               | ddpcr. gc m <sup>-3</sup> and frequency of detection   |
| (30) Beijing Normal University, China                        | Urban air                              | PM <sub>2.5</sub> and ambient air      | Total ARGs, then qPCR for <i>tetM</i> , <i>tetO</i> , <i>tetW</i> , <i>ermB</i> , <i>ermQ</i> , <i>mphE</i> , and <i>aph(3')-IIIa</i>                             | <i>ermB</i> , <i>tetW</i> , and <i>mphE</i> .                                                                                                                                                                                                                                                                                                                                                                                 | Metagenomics (% total DNA). qPCR (gc m <sup>-3</sup> ) |
| (35) Tianjin, China                                          | University campus                      | PM <sub>2.5</sub> and PM <sub>10</sub> | ~60 ARGs. (Aminoglycoside, $\beta$ -lactam, cloramphenicol, MLSB, multidrug, sulfonamide, tetracycline, vancomycin, colistin) / <i>intl1</i> , <i>tnpA</i>        | <i>intl1</i> , <i>strB</i> , <i>aac(6')-Ib</i> , <i>sul2</i> , <i>aadA1</i> , <i>aadA2</i> , <i>bacA</i> , <i>qacEdelta1</i> , <i>tnpA</i> , $\beta$ -lactams ( <i>ampC-02</i> , <i>blaIMP-01</i> , <i>blaSHV-01</i> , and <i>blaCTX-M</i> )                                                                                                                                                                                  | HT-qPCR (gc/16S)                                       |

|                         |                                                                         |                                        |                                                                                                                                                                                                                                                                       |                                                                                                                                                                                                                                                               |                                                           |
|-------------------------|-------------------------------------------------------------------------|----------------------------------------|-----------------------------------------------------------------------------------------------------------------------------------------------------------------------------------------------------------------------------------------------------------------------|---------------------------------------------------------------------------------------------------------------------------------------------------------------------------------------------------------------------------------------------------------------|-----------------------------------------------------------|
| (34) Beijing, China     | Urban megacity air                                                      | PM <sub>2.5</sub> and PM <sub>10</sub> | Total ARGs                                                                                                                                                                                                                                                            | <i>blaTEM</i> , MFS, RND, Erm 23S ribosomal RNA methyltransferase, <i>tet</i> RPP, <i>LNU</i> , <i>sul</i> , <i>ABC-F</i> , <i>CAT</i> , and <i>ANT</i>                                                                                                       | Metagenomics. reads per kilobase per million reads (RPKM) |
| (32) Bolu, Turkey       | Urban air                                                               | PM <sub>10</sub>                       | <i>qnrS</i> , <i>sul1</i> , <i>mecA</i> , and <i>ctx-m-32</i> / <i>int11</i>                                                                                                                                                                                          | <i>MecA</i> , <i>Sul1</i> , <i>Int11</i> , <i>qnrS</i> in order of abundance                                                                                                                                                                                  | qPCR (gc/16S, gc m <sup>-3</sup> )                        |
| (31) Harbin, China      | Urban (hazy PM >75ug/m <sup>3</sup> non-hazy PM < 75ug/m <sup>3</sup> ) | PM <sub>2.5</sub> and PM <sub>10</sub> | <i>ermB</i> , <i>ermG</i> , <i>mexF</i> , <i>tetW</i> , <i>qnrS</i> , <i>aadd</i> , <i>sul1</i> , and <i>blactx-M1</i> / <i>int11</i>                                                                                                                                 | <i>sul1</i> , <i>int11</i> , <i>aadd</i> (hazy), and <i>qnrS</i> (hazy). Hazy days higher than non hazy, but <i>int11</i> higher on non hazy                                                                                                                  | qPCR (gc/16S and gc m <sup>-3</sup> )                     |
| (38) Handan City, China | Urban Air                                                               | PM <sub>2.5</sub>                      | <i>sul1</i> , <i>sul2</i> , <i>tetA</i> , <i>tetQ</i> , <i>qnrB</i> , <i>qnrS</i> , <i>ermB</i> , <i>ermC</i> , <i>ampC</i> , and <i>aacC2</i> / <i>int11</i>                                                                                                         | <i>Sul1</i> , <i>sul2</i> , <i>tetA</i> , <i>ampC</i> , and <i>int11</i> all seasons.<br>Winter: <i>tetQ</i> , <i>qnrB</i> , <i>qnrS</i> , <i>ermB</i> , <i>ermC</i> , <i>aacC2</i><br>Spring: <i>tetQ</i><br>Autumn: <i>tetQ</i> , <i>qnrS</i> , <i>ermC</i> | qPCR (gc/16S and gc m <sup>-3</sup> )                     |
| (42) Xiangxiang, China  | University Campus                                                       | PM <sub>2.5</sub> and TSP              | <i>ermC</i> , <i>sul1</i> , <i>sul2</i> , <i>tetW</i> , and <i>blaTEM</i> / <i>int11</i>                                                                                                                                                                              | <i>ermC</i> , <i>sul1</i> , <i>sul2</i> , <i>blaTEM</i> , and <i>int11</i> on excellent and moderate pollution days. <i>tetW</i> only on excellent air quality days                                                                                           | qPCR (gc/16S and gc m <sup>-3</sup> )                     |
| (90) Handan City, China | University Campus                                                       | PM <sub>2.5</sub>                      | <i>sul1</i> , <i>sul2</i> , <i>tetQ</i> , <i>tetA</i> , <i>qepA</i> , <i>qnrA</i> , <i>qnrB</i> , <i>qnrS</i> , <i>ermB</i> , <i>ermC</i> , <i>OXA-1</i> , <i>OXA-10</i> , <i>CMY-2</i> , <i>ampC</i> , <i>DHA-1</i> , <i>SHV-1</i> , and <i>aacC2</i> / <i>int11</i> | <i>int11</i> , <i>sul1</i> , <i>sul2</i> , <i>qepA</i> , and <i>ampC</i> for all conditions. During rain, <i>tetQ</i> , <i>tetA</i> , <i>qnrB</i> , <i>qnrS</i> , and <i>OXA-1</i>                                                                            | qPCR (gc/16S and gc m <sup>-3</sup> )                     |

Table S3: Key rural air ARG studies identified in this review

| (Ref) Location                     | Sample Type (# of sites)                                            | Sample Fraction | ARGs / MGEs                                                                                                                  | Dominant ARGs                                                                                                                                                    | Analysis method (units)                              |
|------------------------------------|---------------------------------------------------------------------|-----------------|------------------------------------------------------------------------------------------------------------------------------|------------------------------------------------------------------------------------------------------------------------------------------------------------------|------------------------------------------------------|
| (61) Six provinces in South Korea  | Commercial pig farms (7)                                            | TSP             | six TcR genes (RPP class: <i>tetO</i> , <i>tetQ</i> and <i>tetW</i> ; EFP class: <i>tetB</i> , <i>tetH</i> and <i>tetZ</i> ) | RPP ( <i>tetO</i> , <i>tetQ</i> and <i>tetW</i> ) higher than EFP ( <i>tetB</i> , <i>tetH</i> , and <i>tetZ</i> ), but all high concentration                    | qPCR (gc m <sup>-3</sup> )                           |
| (59) Eastern Canada                | Swine barns (18)                                                    | TSP             | <i>tet</i> genes                                                                                                             | <i>TetA/tetC</i> , <i>tetG</i> were detected in the bioaerosols of all 18 studied buildings.                                                                     | PCR (Frequency)                                      |
| (23) Lubbock, Texas                | Cattle feed yards (10)                                              | TSP             | <i>TetM</i> , <i>TetO</i> , <i>TetQ</i> , <i>TetW</i> , <i>TetB</i> , and <i>TetL</i>                                        | <i>TetQ</i> and <i>TetW</i>                                                                                                                                      | qPCR (gc/16S)                                        |
| (62) Saskatchewan                  | Cage-housed (CH) (15) and floor-housed (FH) (15) poultry operations | TSP             | qPCR for <i>tetG</i> . Endpoint PCR for <i>bcrR</i> , <i>ermA</i> , <i>ermB</i> , and <i>tetA/C</i> .                        | In order of frequency. FH: <i>bcrR</i> , <i>ermB</i> , <i>tetA/C</i> , <i>ermA</i> , <i>tetG</i> CH: <i>ermB</i> , <i>bcrR</i> , <i>tetA/C</i> , and <i>tetG</i> | qPCR (gc m <sup>-3</sup> ). Endpoint PCR (Frequency) |
| (56) Vion, Boxtel, the Netherlands | Dutch pig slaughterhouse (1)                                        | TSP             | <i>tetW</i> , <i>ermB</i>                                                                                                    | All air samples tested positive for <i>tetW</i> and <i>ermB</i> , except cutting room and deboning room                                                          | qPCR (gc/16S, frequency)                             |

|                                   |                                                                                                                                                                      |                           |                                                                                                                                                                                                                                                                                                                                                                                                                                                                                                                                                                                                                                                                                                                        |                                                                                                                                                                   |                                                   |
|-----------------------------------|----------------------------------------------------------------------------------------------------------------------------------------------------------------------|---------------------------|------------------------------------------------------------------------------------------------------------------------------------------------------------------------------------------------------------------------------------------------------------------------------------------------------------------------------------------------------------------------------------------------------------------------------------------------------------------------------------------------------------------------------------------------------------------------------------------------------------------------------------------------------------------------------------------------------------------------|-------------------------------------------------------------------------------------------------------------------------------------------------------------------|---------------------------------------------------|
| (57) Beijing, China               | Biogas plant of a commercial swine farm (1)                                                                                                                          | TSP                       | six quinolone, seven sulfonamide, twelve tetracycline, eight macrolide, seven $\beta$ -Lactamase, four vancomycin, and one polymyxin / <i>int1</i> and <i>tnpA</i>                                                                                                                                                                                                                                                                                                                                                                                                                                                                                                                                                     | <i>blaTEM</i> (order of magnitude higher than rest combined), <i>tetC</i> , <i>tetK</i> , <i>qnrD</i> , <i>tetQ</i> , <i>sul3</i> , <i>sul1</i> , <i>qnrS</i>     | HT-qPCR (gc/16S)                                  |
| (63) Guizhou province, China      | Swine confinement buildings (SCBs) weaning piglets (WP), finishing pigs (FP), farrowing sows (FS), gestating sows (GS), and breeding boars (BB) (3 of each building) | TSP                       | Total ARGs                                                                                                                                                                                                                                                                                                                                                                                                                                                                                                                                                                                                                                                                                                             | aminoglycosides, aminocoumarin, mupirocin, elfamycin, fluoroquinolone, pleuromutilin, rifampin, and lincosamide. <i>alaS</i> . <i>APH3-IIIa</i>                   | Metagenomics (gc/total DNA)                       |
| (55) The Netherlands              | Residential sites near livestock (61)                                                                                                                                | PM <sub>10</sub>          | <i>tetW</i> , <i>mecA</i>                                                                                                                                                                                                                                                                                                                                                                                                                                                                                                                                                                                                                                                                                              | <i>mecA</i> - 88%, <i>tetW</i> - 95%. <i>tetW</i> higher concentration                                                                                            | qPCR (gc m <sup>-3</sup> , Frequency)             |
| (66) Quebec, Canada               | Swine confinement buildings (10)                                                                                                                                     | Total dust                | <i>blaCTX-M-1</i> , <i>mcr-1</i>                                                                                                                                                                                                                                                                                                                                                                                                                                                                                                                                                                                                                                                                                       | <i>blaCTX-M-1</i> and <i>mcr-1</i> found in 6 out of 10 SCBs up to 100s of copies/m <sup>3</sup>                                                                  | qPCR (gc m <sup>-3</sup> , Frequency)             |
| (60) South Korea                  | Swine confinement buildings (3)                                                                                                                                      | TSP                       | ribosomal protection proteins (RPP) class: <i>tetO</i> , <i>tetQ</i> , and <i>tetW</i> ; Efflux class: <i>tetB</i> , <i>tetH</i> , and <i>tetZ</i>                                                                                                                                                                                                                                                                                                                                                                                                                                                                                                                                                                     | <i>tetO</i> , <i>tetQ</i> , and <i>tetW</i> higher than <i>tetB</i> , <i>tetH</i> , and <i>tetZ</i>                                                               | qPCR (gc m <sup>-3</sup> , Frequency)             |
| (46) Pearl River Estuaries, China | Rural/river                                                                                                                                                          | TSP                       | <i>blaCTX-M</i> , <i>blaTEM</i> , <i>mecA</i> , <i>aadA</i> , <i>aadE aacA/aphD</i> , <i>str</i> , <i>sat</i> , <i>tetA</i> , <i>tetB</i> , <i>tetC</i> , <i>tetD</i> , <i>tetG</i> , <i>tetL</i> , <i>tetM</i> , <i>tetO</i> , <i>tetQ</i> , <i>tetS</i> , <i>tetT</i> , <i>tetX</i> , <i>tetW</i> , <i>ereA</i> , <i>ermB</i> , <i>ermC</i> , <i>ermT</i> , <i>lnuA</i> , <i>lnuB</i> , <i>vatE</i> , <i>mefA</i> , <i>sul1</i> , <i>sul2</i> , <i>sul3</i> , <i>acrA</i> , <i>mexF</i> . / integrons ( <i>Int1</i> , <i>Int2</i> , and <i>Int3</i> ), Insertion sequences ( <i>IS26</i> , <i>IS613</i> and <i>ISCR3</i> ), plasmids ( <i>traA</i> and <i>trbC</i> ) and transposons ( <i>merA</i> and <i>tnpA</i> ) | <i>tetA</i> and <i>tetB</i> , <i>sat</i> , and MGEs.                                                                                                              | qPCR (gc m <sup>-3</sup> , gc/16S)                |
| (58) Illinois and Indiana         | Pig (8), turkey (3), and poultry (3) confinement buildings                                                                                                           | TSP                       | <i>TetB</i> , <i>TetH</i> , <i>TetZ</i> , <i>TetO</i> , <i>TetQ</i> and <i>TetW</i>                                                                                                                                                                                                                                                                                                                                                                                                                                                                                                                                                                                                                                    | RPP ( <i>tetO</i> , <i>tetQ</i> , and <i>tetW</i> ) higher than EFP ( <i>tetB</i> , <i>tetH</i> , and <i>tetZ</i> ), but all high concentration. None in offices. | qPCR (gc/ng DNA extracted)                        |
| (64) California, USA              | Conventional (3) and Organic (3) beef cattle farms                                                                                                                   | Particles > 1.6 $\mu$ m   | <i>blaTEM</i> , <i>blaSHV</i> , <i>sul1</i> , <i>ermB</i> , and <i>ermF</i>                                                                                                                                                                                                                                                                                                                                                                                                                                                                                                                                                                                                                                            | Conventional: <i>sul1</i> and <i>blaSHV</i> ( <i>ermB</i> and <i>blaTEM</i> detected but not quantified) Organic: <i>sul1</i> and <i>ermF</i>                     | qPCR (gc m <sup>-3</sup> , Frequency)             |
| (52) Beijing, China               | Concentrated animal-feeding operations (CAFOs) layer (4) and broiler (4)                                                                                             | TSP                       | <i>tetL</i> and <i>tetW</i>                                                                                                                                                                                                                                                                                                                                                                                                                                                                                                                                                                                                                                                                                            | <i>tetL</i> and <i>tetW</i>                                                                                                                                       | qPCR (gc/16S)                                     |
| (67) Beijing, China               | Composting site                                                                                                                                                      | TSP                       | <i>int1</i> and 22 subtypes of ARGs                                                                                                                                                                                                                                                                                                                                                                                                                                                                                                                                                                                                                                                                                    | <i>int1</i>                                                                                                                                                       | droplet digital PCR (gc/16S, gc m <sup>-3</sup> ) |
| (53) Texas, US                    | Beef cattle feedyards (5)                                                                                                                                            | TSP                       | <i>tetW</i> , <i>tetQ</i> , <i>tetO</i> , <i>tetM</i> , <i>tetL</i> , and <i>tetB</i>                                                                                                                                                                                                                                                                                                                                                                                                                                                                                                                                                                                                                                  | <i>tetW</i> , <i>tetQ</i> , and <i>tetM</i>                                                                                                                       | qPCR (Copies)                                     |
| (65) 9 European Countries         | Broiler farms (174) Farrow-to-finish Pig Farms (159)                                                                                                                 | TSP                       | <i>tetW</i> , <i>ermB</i> , <i>aph(3')-III</i> and <i>sul2</i>                                                                                                                                                                                                                                                                                                                                                                                                                                                                                                                                                                                                                                                         | From highest to lowest abundance: <i>ermB</i> , <i>tetW</i> , <i>sul2</i> , <i>aph3-III</i>                                                                       | qPCR (gc/16S)                                     |
| (54) Weinan city, China           | Swine Farm                                                                                                                                                           | PM <sub>2.5</sub> and TSP | <i>tetM</i> , <i>tetG</i> , <i>tetO</i> , <i>sul1</i> , <i>sul2</i> , <i>qnrA</i> , <i>ermA</i> , <i>ermB</i> , and <i>strA</i> / <i>int1</i> , <i>IS613</i> , and <i>Tp614</i>                                                                                                                                                                                                                                                                                                                                                                                                                                                                                                                                        | Winter and Summer: <i>strA</i> , <i>ermB</i> , <i>ermA</i> , <i>tetM</i> , <i>tetO</i> .                                                                          | qPCR (gc m <sup>-3</sup> )                        |

Winter: *qnrA*, *sul1*, *sul2*, *tetG*, *int1*, *IS613*, and *Tp614*

Table S4: Significant hospital air ARG studies discussed in this review

| (Ref) Location                  | Sample Type (# of sites)         | Sample Fraction                        | ARGs / MGEs                                                                                                                                                  | Dominant ARGs                                                                                                                                                                                                                                                                                                                                                                                                                                                   | Analysis method (units)        |
|---------------------------------|----------------------------------|----------------------------------------|--------------------------------------------------------------------------------------------------------------------------------------------------------------|-----------------------------------------------------------------------------------------------------------------------------------------------------------------------------------------------------------------------------------------------------------------------------------------------------------------------------------------------------------------------------------------------------------------------------------------------------------------|--------------------------------|
| (71) QC, Canada                 | Recently occupied hospital rooms | TSP, tap water                         | <i>vanA</i> , <i>vanB</i> , <i>tetA</i> , <i>tetC</i> , <i>tetG</i> , <i>ermA</i> , <i>ermB</i> , <i>ermC</i> , <i>ermF</i> , <i>ermT</i> , <i>ermX</i>      | <i>ermX</i> (10/10), <i>erm(F)</i> (9/10), and <i>tetG</i> (6/10)                                                                                                                                                                                                                                                                                                                                                                                               | Endpoint PCR (Frequency)       |
| (72) Toronto, ON, Canada        | Hospital air                     | Filter Dust                            | <i>aac(6')-aph(2'')</i> , <i>ermA</i> , <i>mecA</i> , and <i>vanA</i>                                                                                        | <i>mecA</i> (15/15), <i>aac(6')-aph(2'')</i> (10/15), and <i>ermA</i> (6/15)                                                                                                                                                                                                                                                                                                                                                                                    | Endpoint PCR (Frequency)       |
| (69) Eastern and Southern China | Urban hospitals (5)              | TSP                                    | <i>blaCTX-M</i> and <i>mecA</i>                                                                                                                              | <i>blaCTX-M</i> and <i>mecA</i> both abundant (1000 - 100,000 gc/ng DNA). <i>mecA</i> > <i>blaCTX-M</i>                                                                                                                                                                                                                                                                                                                                                         | qPCR (gc/ng DNA)               |
| (70) Leicster, England          | Hospital                         | Exhaled Aerosols                       | <i>AmpC</i> , <i>blaTEM</i> , <i>CfxA</i> , <i>FOX-5</i> , <i>PBP2X</i> , <i>ErmB</i> , <i>mefA</i> , <i>tetM</i> , <i>tetA</i> and <i>AcrA-05</i>           | <i>mefA</i> , <i>tetM</i> , <i>ErmB</i> , and <i>blaTEM</i>                                                                                                                                                                                                                                                                                                                                                                                                     | qPCR (Frequency, gc/mask)      |
| (68) Beijing, China             | Hospital                         | Air Filter Dust                        | Total ARGs. qPCR for <i>blaNDM</i> , <i>qnrA</i> , <i>sul2</i> , <i>vanA</i> , and <i>tetW</i> / <i>int1</i>                                                 | <i>int1</i> and <i>tetW</i> for qPCR. Most commonly shared: <i>aadD</i> , <i>CE</i> , <i>tetK</i> , <i>tetA</i> , <i>tetZ</i> and <i>norA</i> , <i>lnuA</i> , <i>bacA</i> , <i>sul1</i> , <i>mexT</i> , <i>marR</i> , chloramphenicol exporter, <i>ompR</i> , <i>aadA</i> , <i>ermB</i> , <i>aph(3'')-I</i>                                                                                                                                                     | Metagenomics and qPCR (gc/16S) |
| (76) Guangzhou, China           | Hospital                         | PM <sub>2.5</sub>                      | Total ARGs                                                                                                                                                   | <i>aadA</i> , <i>aadD</i> , <i>aadE</i> , <i>ant(9)-I</i> , <i>aph(3''')-iii</i> , <i>bacA</i> , <i>class-a</i> , <i>ugd</i> , <i>ermB</i> , <i>ermC</i> , <i>ermT</i> , <i>lnuA</i> , <i>mphC</i> , <i>msrA</i> , <i>emrB</i> , <i>qacA</i> , <i>mfs_transporter</i> , <i>mexB</i> , <i>mexF</i> , <i>mtrA</i> , <i>abc_transporter</i> , <i>norA</i> , <i>rpoB2</i> , <i>sul1</i> , <i>tet(k)</i> , <i>tetL</i> , <i>tetM</i> , <i>tetO</i> , and <i>tetW</i> | Metagenomics (gc/16S)          |
| (73) China                      | Hospital                         | PM <sub>2.5</sub> and PM <sub>10</sub> | Aminoglycoside, beta-lactam, fluoroquinolone/quinolone/florfenicol/chloramphenicol/amphenicol (FCA), MLSB), sulfonamide, tetracycline, vancomycin, multidrug | aminoglycoside and multidrug                                                                                                                                                                                                                                                                                                                                                                                                                                    | HT-qPCR (gc/16S)               |

Table S5: Key wastewater air ARG studies identified in this review

| (Ref) Location           | Sample Type         | Sample Fraction          | ARGs / MGEs                                                                                                                                      | Dominant ARGs                                                                                                                                                                            | Analysis method (units) |
|--------------------------|---------------------|--------------------------|--------------------------------------------------------------------------------------------------------------------------------------------------|------------------------------------------------------------------------------------------------------------------------------------------------------------------------------------------|-------------------------|
| (81) South Carolina, USA | WWTP air and sludge | TSP                      | vancomycin, tetracyclines, fluoroquinolone, aminoglycoside, macrolide-lincosamide-streptogramin B, and multidrug resistance classifications      | B-lactam with serine-utilizing hydrolases. <i>ermB</i> , <i>ermC</i> , <i>tetA</i> , <i>tetB</i> , <i>aadA1</i> , <i>qnrB5</i> , <i>mefA</i> , <i>msrA</i>                               | qPCR (gc/ng DNA)        |
| (80) Seoul, South Korea  | WWTPs               | TSP                      | Total ARGs                                                                                                                                       | <i>sul1</i> , <i>sul2</i> , <i>ermB</i> , <i>ermG</i> , <i>ermF</i> , <i>tetA</i> , <i>tetG</i> , <i>tetQ</i> , <i>tetW</i> , <i>int11</i>                                               | Metagenomics (gc/16S)   |
| (79) China               | WWTP                | Submicron aerosols (SAs) | Total ARGs                                                                                                                                       | <i>BacA</i> , RPP ( <i>tetO</i> , <i>tetQ</i> , and <i>tetW</i> ), EFP ( <i>tetB</i> , <i>tetH</i> , and <i>tetZ</i> ), <i>aph</i> , <i>aac</i> , <i>sul</i> , <i>ant</i> , <i>vat</i> . | Metagenomics (gc/16S)   |
| (78) Beijing, China      | WWTP                | TSP                      | <i>sul1</i> , <i>sul2</i> , <i>sul3</i> , <i>tetA</i> , <i>tetC</i> , <i>tetO</i> , <i>tetW</i> , <i>int11</i> , <i>int12</i> , and <i>int13</i> | <i>sul2</i> and <i>int11</i>                                                                                                                                                             | PCR (Frequency)         |

Table S6: Key landfill/waste air ARG studies identified in this review

| (Ref) Location        | Sample Type                  | Sample Fraction                        | ARGs / MGEs                                                                                  | Dominant ARGs                                                                                                      | Analysis method (units)    |
|-----------------------|------------------------------|----------------------------------------|----------------------------------------------------------------------------------------------|--------------------------------------------------------------------------------------------------------------------|----------------------------|
| (83) Changzhou, China | Municipal solid waste system | PM <sub>2.5</sub> and PM <sub>10</sub> | <i>sul</i> , <i>tet</i> , quinolone, aminoglycoside, macrolide, B-lactam, and <i>int11</i> . | <i>int11</i> , <i>blaTEM-1</i> , <i>sul1</i> , <i>sul2</i> , <i>sul3</i> , <i>tetA</i> , <i>tetM</i> , <i>ermB</i> | qPCR (gc m <sup>-3</sup> ) |

Table S7: Significant indoor air ARG studies identified in this review

| (Ref) Location                           | Sample Type              | Sample Fraction | ARGs / MGEs                                                                                                                                                                                                     | Dominant ARGs                                                   | Analysis method (units)    |
|------------------------------------------|--------------------------|-----------------|-----------------------------------------------------------------------------------------------------------------------------------------------------------------------------------------------------------------|-----------------------------------------------------------------|----------------------------|
| (85) Queensland University of Technology | Indoor air               | TSP             | <i>ermA</i> , <i>ermB</i> , <i>ermF</i> , <i>vanA</i> , <i>vatD</i> , <i>tetA</i> , <i>tetC</i> , <i>tetG</i> , <i>tetM</i> , <i>tetO</i> , <i>tetP</i> , <i>tetQ</i> , <i>tetS</i> , <i>tetT</i> , <i>tetW</i> | <i>tetA/C</i> most, then <i>ermB</i> and <i>vanD</i>            | Endpoint PCR (Frequency)   |
| (87) Tianjin, China                      | Laboratory               | TSP             | <i>tetM</i> , <i>tetG</i> , <i>tetC</i> , <i>tetO</i>                                                                                                                                                           | <i>tetM</i> , with biology lab > chemical lab                   | qPCR (gc m <sup>-3</sup> ) |
| (89) Hong Kong                           | Indoor air. kindergarten | Filter dust     | tetracyclines, macrolides, sulfonamides, B-lactams, aminoglycosides, and amphenicols                                                                                                                            | Air: <i>sul1</i> , <i>sul2</i> , <i>ermF</i> , and <i>int11</i> | qPCR (gc/16S)              |



Table S8: Key air ARG studies with multiple sources identified in this review

| (Ref) Location                  | Sample Type (# of sites)                                                           | Sample Fraction                        | ARGs / MGEs                                                                                                                                                                                                                                                                                | Dominant ARGs                                                                                  | Analysis method (units)               |
|---------------------------------|------------------------------------------------------------------------------------|----------------------------------------|--------------------------------------------------------------------------------------------------------------------------------------------------------------------------------------------------------------------------------------------------------------------------------------------|------------------------------------------------------------------------------------------------|---------------------------------------|
| (45) Beijing, China             | Urban air (site 1: 61, site 2: 44)                                                 | PM <sub>2.5</sub>                      | <i>ermB</i> , <i>tetW</i> , <i>qnrS</i> , <i>lnuA</i> , <i>blaTEM 1</i> , and <i>sul1 / intl1</i> , <i>tnpA02</i> , and <i>tnpA-04</i>                                                                                                                                                     | <i>lnuA</i>                                                                                    | qPCR (gc/16S)                         |
| (45) Pearl River Delta, China   | Air (industrial: 46, urban: 48, and rural 18)                                      |                                        |                                                                                                                                                                                                                                                                                            | <i>lnuA</i> and <i>sul1</i>                                                                    |                                       |
| (45) Yangtze River Delta, China | Air (industrial: 122, urban: 52, and rural 65)                                     |                                        |                                                                                                                                                                                                                                                                                            | <i>ermB</i> Urban air: <i>blaTEM</i>                                                           |                                       |
| (21) Pearl River Delta, China   | Air (industrial: 46, urban: 48, and rural 18)                                      | PM <sub>2.5</sub>                      | <i>ermB</i> , <i>tetW</i> , <i>qnrS</i> , <i>lnuA</i> , <i>blaTEM 1</i> , and <i>sul1 / intl1</i> , <i>tnpA02</i> , and <i>tnpA-04</i>                                                                                                                                                     | <i>ermB</i> , <i>tetW</i>                                                                      | qPCR (gc m <sup>-3</sup> , gc/16S)    |
| (22) Tianjin, China             | WWTP, bathroom, lab, hospital, outdoor                                             | TSP                                    | <i>tetM</i> , <i>tetG</i> , <i>tetC</i> , <i>tetO</i> , <i>tetA</i> , <i>tetQ</i> , <i>tetW</i> , <i>sul1</i> , <i>sul2</i> , <i>sul3</i> , <i>ermA</i> , <i>ermB</i> , <i>ermC</i> , <i>blaOXA-1</i> , <i>blaDHA-1</i> , <i>blaAMPc</i> , <i>blaTEM-1</i> , <i>blaCMY-2</i> , <i>qnrS</i> | <i>blaTEM-1</i> , <i>blaAmpc</i> , <i>blaOXA-1</i> , and <i>tetM</i>                           | qPCR (gc m <sup>-3</sup> )            |
| (47) Zhuhai, China              | Urban air                                                                          | TSP                                    | Total ARGs                                                                                                                                                                                                                                                                                 | <i>bacA</i> , <i>mexF</i> , <i>lnuA</i> , <i>mexW</i> , <i>aadE</i>                            | Metagenomics (gc/16S)                 |
|                                 | Chicken farm                                                                       |                                        |                                                                                                                                                                                                                                                                                            | <i>aph(3')-I</i> , <i>sul1</i> for CF. <i>aadE</i> and <i>tetW</i> for CF-A. <i>mexF</i> both. |                                       |
|                                 | Pig farm                                                                           |                                        |                                                                                                                                                                                                                                                                                            | <i>aadE</i> , <i>ermT</i> , and <i>vatE</i> . <i>aad(9)</i> in PF, <i>mexF</i> in PF-A         |                                       |
|                                 | WWTP air                                                                           |                                        |                                                                                                                                                                                                                                                                                            | <i>mexF</i> , <i>amrB</i> and <i>mexW</i>                                                      |                                       |
| (86) Colorado                   | Indoor air (two CAFOs (one swine, one dairy), two clinics, and a homeless shelter) | PM <sub>10</sub>                       | <i>tetW</i> and <i>tetX</i> , <i>intl1</i>                                                                                                                                                                                                                                                 | <i>tetW</i> , <i>tetX</i> , and <i>intl1</i> (only in CAFOs)                                   | qPCR (gc m <sup>-3</sup> , Frequency) |
|                                 | Outdoor air (urban, semiurban, livestock agriculture, and alpine forest)           |                                        |                                                                                                                                                                                                                                                                                            | <i>tetW</i> (low)                                                                              |                                       |
| (40) Israel                     | Floor-housed poultry facility                                                      | PM <sub>10</sub> , TSP                 | <i>intl1</i> , <i>qnRS</i> , <i>sul1</i> , <i>ctx-m-32</i> , and <i>mecA</i>                                                                                                                                                                                                               | <i>intl1</i> , <i>mecA</i> , and <i>ctx-m-32 gene</i>                                          | qPCR (gc/16S)                         |
|                                 | Urban                                                                              |                                        |                                                                                                                                                                                                                                                                                            | <i>intl1</i> and <i>mecA</i>                                                                   |                                       |
| (27) China                      | Urban hospital                                                                     | PM <sub>2.5</sub> and PM <sub>10</sub> | Total ARGs                                                                                                                                                                                                                                                                                 | <i>bacA</i> , chloramphenicol acetyltransferase ( <i>cat</i> ) and <i>lnuA</i>                 | Metagenomics (gc/16S)                 |
|                                 | Urban community                                                                    |                                        |                                                                                                                                                                                                                                                                                            | chloramphenicol exporter gene, <i>sul1</i> , and <i>bacA</i> .                                 |                                       |
|                                 | Suburban communities                                                               |                                        |                                                                                                                                                                                                                                                                                            | chloramphenicol exporter gene, <i>sul1</i> , and <i>aadE</i> .                                 |                                       |
| (74) Ningbo City, China         | Hospitals (3)                                                                      | Filter Dust                            |                                                                                                                                                                                                                                                                                            | <i>bl3_cpha</i> , <i>ermX</i> , <i>lnuA</i> , <i>mexF</i>                                      | HT-qPCR (gc/16S)                      |

|                      |                                                       |                   |                                                                                                                                                                         |                                                                                                                                                                     |                                       |
|----------------------|-------------------------------------------------------|-------------------|-------------------------------------------------------------------------------------------------------------------------------------------------------------------------|---------------------------------------------------------------------------------------------------------------------------------------------------------------------|---------------------------------------|
|                      | farms (chicken, duck, swine), urban (3), villages (3) |                   | Targeted 285 ARGs from all major classes. 177 ARGs were detected between all sample types: Hospital (146 ARGs), farm (154 ARGs), city (103 ARGs), and village (85 ARGs) | <i>tetG, tetQ, tetL, tetM, tetO, tetK, tetX, mexF, ermB, ermT, ermF, pikR1, ermX, lnuA, intl, Cintl, ant3ia</i>                                                     |                                       |
|                      | City Indoor                                           |                   |                                                                                                                                                                         | <i>ermX, vanxd</i>                                                                                                                                                  |                                       |
|                      | Village Indoor                                        |                   |                                                                                                                                                                         | <i>bl3_cpha, lnuA, mexF, intl</i>                                                                                                                                   |                                       |
| (88) Shenzhen, China | Indoor air wet market                                 | TSP               | <i>tetC, tetG, sul2, and ermC</i>                                                                                                                                       | <i>sul2, ermC, tetG, tetC</i>                                                                                                                                       | qPCR (gc/ng DNA, gc m <sup>-3</sup> ) |
|                      | Live poultry air                                      |                   |                                                                                                                                                                         | <i>tetG, sul2, ermC, tetC</i>                                                                                                                                       |                                       |
|                      | Outdoor air                                           |                   |                                                                                                                                                                         | <i>sul2, ermC, tetC, tetG</i>                                                                                                                                       |                                       |
| (84) Tianjin, China  | University campus indoor                              | TSP               | 120 primer pairs based on most common ARGs. 73 ARGs and 5 MGEs detected                                                                                                 | B-lactam, multidrug, and tetracycline resistance. Indoor > Outdoor                                                                                                  | HT-qPCR (gc/16S)                      |
|                      | Campus outdoor                                        |                   |                                                                                                                                                                         | multidrug, aminoglycoside, and tetracycline resistance.                                                                                                             |                                       |
| (82) Hong Kong       | Coastal                                               | PM <sub>2.5</sub> | Total ARGs                                                                                                                                                              | Descending order, Multidrug, peptide, MLS, aminoglycoside, tetracycline, B-lactam, rifamycin, glycopeptide. <i>tetA, bacA, mtrA, mexF, and cpxR</i> indicator ARGs. | Metagenomics (gc/16S)                 |
|                      | Urban                                                 |                   |                                                                                                                                                                         |                                                                                                                                                                     |                                       |
|                      | WWTP                                                  |                   |                                                                                                                                                                         |                                                                                                                                                                     |                                       |

Table S9: Significant miscellaneous air ARG studies identified in this review

| (Ref) Location       | Location Type                     | Sample Fraction   | ARGs/MGEs                 | Dominant ARGs                                                                                                  | Sampling method          |
|----------------------|-----------------------------------|-------------------|---------------------------|----------------------------------------------------------------------------------------------------------------|--------------------------|
| (96) Worldwide       | Glaciers/snow/ice                 | Snow and Ice      | 94 subtypes               | <i>aac(3), strA2, blaIMP, strA1.</i>                                                                           | Endpoint PCR (Frequency) |
| (39) Rehovot, Israel | Eastern Mediterranean dust storms | <PM <sub>10</sub> | <i>qnrS, sul1 / intl1</i> | <i>intl1, qnrS, and sul1</i> genes two-orders of magnitude lower during dust-storms. <i>sul1</i> most abundant | qPCR (gc/16S)            |
